# Supplementary material
Source: PubMed Central journal article supplement (PMC8814784)
Supplement: 40257_2021_661_MOESM1_ESM.pdf [file 40257_2021_661_MOESM1_ESM.pdf]

**American Journal of Clinical Dermatology**

**Supplementary Material**

**Culprit medications and risk factors associated with Stevens-Johnson syndrome and toxic epidermal necrolysis: real-world population-based cohort**

Naomi Gronich, MD<sup>1,2\*</sup>, David Maman<sup>1</sup>, Nili Stein, MSc<sup>2</sup>, Walid Saliba, MD, MPH<sup>1,2</sup>

From the <sup>1</sup>Ruth and Bruce Rappaport Faculty of Medicine, Technion–Israel Institute of Technology, <sup>2</sup>Department of Community Medicine and Epidemiology, Lady Davis Carmel Medical Center, Haifa, Israel

\*corresponding author

**Address of corresponding author:**

Naomi Gronich, M.D.

Department of Community Medicine and Epidemiology

Carmel Medical Center, 7 Michal St. Haifa 3436212, Israel

Tel: 972-4-825 0474 Fax: 972-4-834 4358, E-mail: [gronichn@clalit.org.il](mailto:gronichn@clalit.org.il)

**Supplementary Table S1:** List of all validated SJS/TEN patients, Clalit, 2008-2019

| No. | Sex | Year of Diagnosis | Age | Culprit drug            | ALDEN calculated score | Smoking | Former allergies to         | Mortality from SJS/TEN | SCORTEN Score |
|-----|-----|-------------------|-----|-------------------------|------------------------|---------|-----------------------------|------------------------|---------------|
| 1   | F   | 2008              | 66  | Phenytoin               | 3                      | N       | 0                           | N                      | 2             |
| 2   | M   | 2008              | 36  | Etodolac                | 4                      | N       | 0                           | N                      | 0             |
| 3   | F   | 2009              | 34  | Amoxicillin-clavulanate | 3                      | N       | Dipyron, paracetamol        | N                      | 0             |
| 4   | F   | 2009              | 45  | Terbinafine             | 3                      | Y       | 0                           | N                      | 2             |
| 5   | F   | 2009              | 74  | Lamotrigine             | 6                      | N       | 0                           | N                      | 2             |
| 6   | F   | 2009              | 37  | Lamotrigine             | 6                      | N       | Penicillin                  | N                      | 2             |
|     |     |                   |     | Roxithromycin           | 3                      |         |                             |                        |               |
|     |     |                   |     | Cefuroxime              | 4                      |         |                             |                        |               |
| 7   | M   | 2010              | 72  | NA                      | NA                     | Y       | Dipyron                     | N                      | 3             |
| 8   | F   | 2010              | 73  | Phenytoin               | 6                      | N       | 0                           | N                      | 3             |
| 9   | M   | 2010              | 60  | Clindamycin             | 2                      | Y       | 0                           |                        | 1             |
| 10  | M   | 2010              | 21  | Cefuroxime              | 5                      | N       | 0                           | N                      | 0             |
| 11  | F   | 2010              | 23  | Lamotrigine             | 6                      | N       | 0                           | N                      | 2             |
| 12  | F   | 2011              | 78  | Allopurinol             | 6                      | Y       | Iodine, Aspirin, Lornoxicam | N                      | 3             |
| 13  | F   | 2011              | 45  | Ibuprofen               | -2                     | N       | 0                           | N                      | 2             |
|     |     |                   |     | Citalopram              | 0                      |         |                             |                        |               |
| 14  | F   | 2011              | 44  | Carbamazepine           | 4                      | N       | 0                           | N                      | 1             |
|     |     |                   |     | Pregabalin              | 0                      |         |                             |                        |               |
| 15  | M   | 2011              | 24  | Sulfasalazine           | 6                      | N       | 0                           | N                      | 1             |
| 16  | F   | 2011              | 62  | Amoxicillin-clavulanate | 3                      | N       | 0                           |                        | 3             |
|     |     |                   |     | Ciprofloxacin           | 2                      |         |                             |                        |               |
| 17  | F   | 2011              | 54  | Amoxicillin-clavulanate | 2                      | Y       | 0                           | N                      | 3             |
|     |     |                   |     | Cefuroxime              | 5                      |         |                             |                        |               |

|    |   |      |    |                               |    |   |                                          |   |    |
|----|---|------|----|-------------------------------|----|---|------------------------------------------|---|----|
| 18 | M | 2011 | 51 | Topiramate                    | 3  | Y | Valproate                                | N | 2  |
| 19 | M | 2011 | 23 | Codeine                       | 1  | N | 0                                        | N | 1  |
| 20 | F | 2012 | 63 | Phenytoin                     | 6  | N | 0                                        | N | 2  |
| 21 | M | 2012 | 44 | acyclovir                     | 2  | N | 0                                        | N | 1  |
| 22 | M | 2012 | 40 | Roxithromycin                 | 4  | Y | 0                                        | N | 2  |
| 23 | M | 2012 | 60 | Ciprofloxacin                 | 5  | Y | Penicillin, Ibuprofen                    | N | 1  |
| 24 | M | 2012 | 74 | Phenytoin                     | 6  | N | 0                                        |   |    |
|    |   |      |    | Amoxicillin                   | 2  |   |                                          | Y | 4  |
| 25 | F | 2013 | 70 | Valproic Acid                 | 4  | Y | Dipyrrone, Penicillin                    | N | 2  |
| 26 | F | 2013 | 80 | Macrogol                      | 1  | Y | Erythromycin, Phenazopyridine, Ofloxacin | N | 1  |
| 27 | F | 2013 | 68 | Etoricoxib                    | NA | N | 0                                        | N | 1  |
| 28 | M | 2013 | 63 | Roxithromycin                 | 2  | Y | Penicillin                               | N | 2  |
| 29 | M | 2013 | 36 | Valproic Acid                 | NA | N | Penicillin                               | N | 0  |
| 30 | F | 2013 | 28 | Trimethoprim-sulfamethoxazole | 1  | N | Lidocaine, Penicillin                    | N | 3  |
| 31 | M | 2013 | 50 | Etodolac                      | 5  | Y | 0                                        | N | 2  |
| 32 | F | 2013 | 29 | Etoricoxib                    | 6  | Y | 0                                        | N | 2  |
| 33 | F | 2013 | 75 | Clindamycin                   | 4  | N | 0                                        | N | 1  |
| 34 | F | 2013 | 27 | Lamotrigine                   | 6  | N | Phenytoin, carbamazepine, Levetiracetam  | N | 1  |
| 35 | M | 2013 | 63 | Trimethoprim-sulfamethoxazole | 3  | N | 0                                        | N | 2  |
| 36 | F | 2014 | 83 | Ciprofloxacin                 | 3  | Y | Propoxyphene-Paracetamol CD              | N | 4  |
| 37 | M | 2014 | 84 | NA                            | 0  | Y | 0                                        | Y | NA |
| 38 | F | 2014 | 71 | Phenytoin                     | 5  | Y | 0                                        | N | 5  |
|    |   |      |    | Valproic Acid                 | 2  |   |                                          |   |    |
| 39 | F | 2014 | 76 | Allopurinol                   | 6  | N | 0                                        | N | 3  |
| 40 | F | 2014 | 41 | Levomepromazine               | 3  | Y | 0                                        | N | 1  |
| 41 | F | 2014 | 33 | Lamotrigine                   | 5  | N | 0                                        | N | 1  |
| 42 | M | 2014 | 54 | Lamotrigine                   | 6  | N | 0                                        | N | 2  |
|    |   |      |    | Valproic Acid                 | 3  |   |                                          |   |    |

|    |   |      |    |                               |    |   |                           |   |    |
|----|---|------|----|-------------------------------|----|---|---------------------------|---|----|
| 43 | F | 2014 | 75 | Amoxicillin                   | 5  | N | 0                         | N | 2  |
| 44 | F | 2014 | 85 | NA                            | 0  | N | 0                         | Y | 4  |
| 45 | M | 2015 | 77 | Etoricoxib                    | 6  | Y | 0                         | N | 2  |
| 46 | F | 2015 | 30 | Dipyron                       | 1  | N | 0                         | N | 0  |
| 47 | F | 2015 | 35 | Carbamazepine                 | 6  | Y | 0                         | N | 0  |
| 48 | M | 2015 | 69 | Allopurinol                   | 6  | Y | 0                         | N | 2  |
| 49 | M | 2015 | 71 | Allopurinol                   | 0  | Y |                           | N | 0  |
| 50 | F | 2015 | 20 | Ciprofloxacin                 | 2  | N | 0                         | N | 1  |
|    |   |      |    | Dipyron                       | 2  |   |                           |   |    |
| 51 | M | 2016 | 74 | Carfilzomib                   | NA | Y | 0                         | Y | 5  |
|    |   |      |    | Allopurinol                   | 3  |   |                           |   |    |
|    |   |      |    | Trimethoprim-Sulfamethoxazole | -2 |   |                           |   |    |
| 52 | F | 2016 | 49 | Trimethoprim-Sulfamethoxazole | 6  | Y | Dipyron                   | N | 4  |
|    |   |      |    | Bendamustine                  | -1 |   |                           |   |    |
| 53 | F | 2016 | 44 | Etoricoxib                    | 5  | N | Penicillin                | N | 1  |
| 54 | M | 2016 | 41 | NA                            | NA | N | 0                         | Y | NA |
| 55 | F | 2016 | 67 | Allopurinol                   | 6  | N | Doxycycline, Propoxyphene | N | 2  |
| 56 | M | 2016 | 35 | Sunitinib                     | 4  | N | 0                         | Y | 2  |
| 57 | F | 2016 | 56 | Amoxicillin                   | 5  | N | 0                         | N | 2  |
| 58 | F | 2016 | 88 | Phenytoin                     | 3  | N | 0                         | N | 2  |
| 59 | M | 2016 | 67 | Vancomycin                    | 3  | Y |                           |   | 3  |
| 60 | F | 2016 | 69 | Allopurinol                   | 6  | N | 0                         | N | 4  |
| 61 | M | 2017 | 85 | Phenytoin                     | 5  | Y |                           | N | 2  |
|    |   |      |    | Quetiapine                    | 1  |   |                           |   |    |
| 62 | M | 2017 | 83 | Ciprofloxacin                 | 3  | Y | Penicillin                | N | 1  |
| 63 | F | 2017 | 54 | Phenytoin                     | 2  | N | 0                         | N | 1  |

|    |   |      |    |                         |        |   |                                                  |   |   |
|----|---|------|----|-------------------------|--------|---|--------------------------------------------------|---|---|
| 64 | F | 2017 | 79 | Allopurinol             | 6      | N | 0                                                | N | 1 |
| 65 | F | 2017 | 78 | Ciprofloxacin           | 3      | N | 0                                                | N | 3 |
| 66 | M | 2017 | 33 | Amoxicillin-clavulanate | 5      | Y | 0                                                | N | 3 |
| 67 | F | 2017 | 60 | Pralatrexate            | 1      | N | Penicillin                                       | N | 3 |
| 68 | F | 2017 | 86 | Allopurinol             | 6      | N | 0                                                | N | 3 |
| 69 | M | 2017 | 29 | Bendamustine            | 3      | N | 0                                                | N | 2 |
|    |   |      |    | Vancomycin              | 0      |   |                                                  |   |   |
| 70 | F | 2017 | 28 | Lamotrigine             | 6      | N | 0                                                | N | 0 |
| 71 | M | 2017 | 27 | Ceftriaxone             | 3      | Y | Infliximab                                       | N | 0 |
| 72 | F | 2017 | 34 | Ofloxacin               | -2     | N | 0                                                | N | 1 |
| 73 | F | 2017 | 65 | NA                      | NA     | N | 0                                                | N | 2 |
| 74 | F | 2017 | 47 | Clindamycin             | 1 or 3 | Y | Penicillin, Iodine, Naproxen, Micropirin         | N | 1 |
|    |   |      |    | Cefazolin               | 2 or 4 |   |                                                  |   |   |
| 75 | M | 2017 | 61 | Etoricoxib              | 6      | Y | 0                                                | N | 1 |
| 76 | F | 2018 | 80 | Amoxicillin             | 2      | Y | Pravastatin, Phenazopyridine, Duloxetine         | N | 1 |
| 77 | F | 2018 | 75 | Lamotrigine             | 4      | N | 0                                                | N | 2 |
| 78 | M | 2018 | 50 | Clindamycin             | 2      | Y | Penicillin                                       | N | 3 |
| 79 | F | 2018 | 59 | Hydroxychloroquine      | 3      | Y | Penicillin, Dipyrone                             | N | 1 |
| 80 | F | 2018 | 51 | Etodolac                | 4      | Y | 0                                                | N | 1 |
| 81 | F | 2018 | 83 | Nitrofurantoin          | 1      | N | Penicillin, Clindamycin, Amikacin, Ciprofloxacin | N | 3 |
| 82 | F | 2018 | 82 | Celecoxib               | NA     | N | 0                                                | N | 1 |
| 83 | F | 2018 | 39 | Amoxicillin             | 3      | Y | 0                                                | N | 0 |
| 84 | M | 2019 | 51 | Amoxicillin             | 1      | N | 0                                                | N | 4 |
|    |   |      |    | Cabozantinib            | 3      |   | 0                                                |   |   |
| 85 | F | 2019 | 47 | Lamotrigine             | 6      | N | 0                                                | N | 1 |
| 86 | F | 2019 | 72 | Allopurinol             | 6      | N | Ibuprofen, Penicillin, Repaglinide               | N | 4 |
| 87 | F | 2019 | 84 | Allopurinol             | 6      | N | 0                                                | N | 4 |
|    |   |      |    | Cefuroxime              | 2      |   |                                                  |   |   |

SJS Stevens–Johnson syndrome, TEN toxic epidermal necrolysis, F Female, M Male, N No, Y yes, NA Not available
